# Supplementary material for: A Novel Eco-Friendly and Highly Sensitive Solid Lead–Tin Microelectrode for Trace U(VI) Determination in Natural Water Samples
Source: MDPI journal article supplement (doi:10.3390/s23052552), 2023-02-24
Supplement: s1 [file s1]

## Supplementary Materials

### A Novel Eco-Friendly and Highly Sensitive Solid Lead-tin Microelectrode for Trace U(VI) Determination in Natural Water samples

\*Iwona Gęca<sup>a</sup>, Mieczysław Korolczuk<sup>a</sup>

<sup>1</sup> *Institute of Chemical Sciences, Faculty of Chemistry, Maria Curie Skłodowska University,*

*20-031 Lublin, Poland*

\* e-mail: iwona.geca@mail.umcs.pl

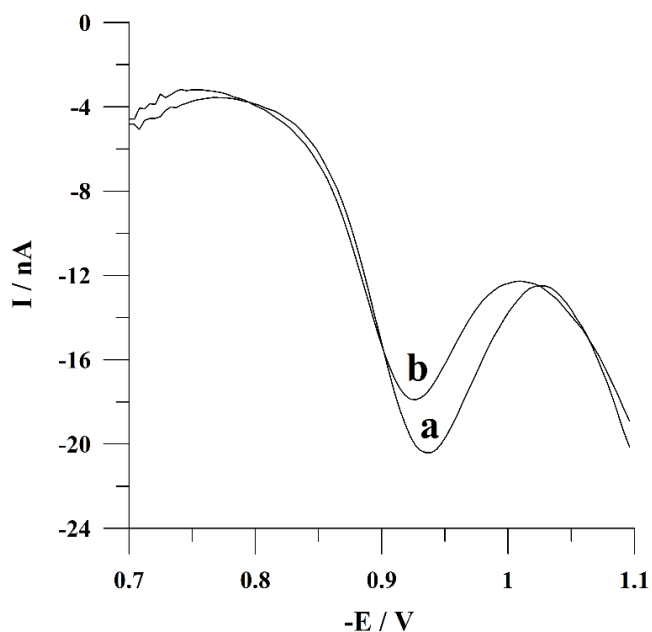

Figure S1. SW voltammograms obtained for U(VI) determination at a concentration of  $5 \times 10^{-8} \text{ mol L}^{-1}$  from: a) a stirred solution; b) an unstirred solution. Potential and time of accumulation: -0.7 V, 120 s.

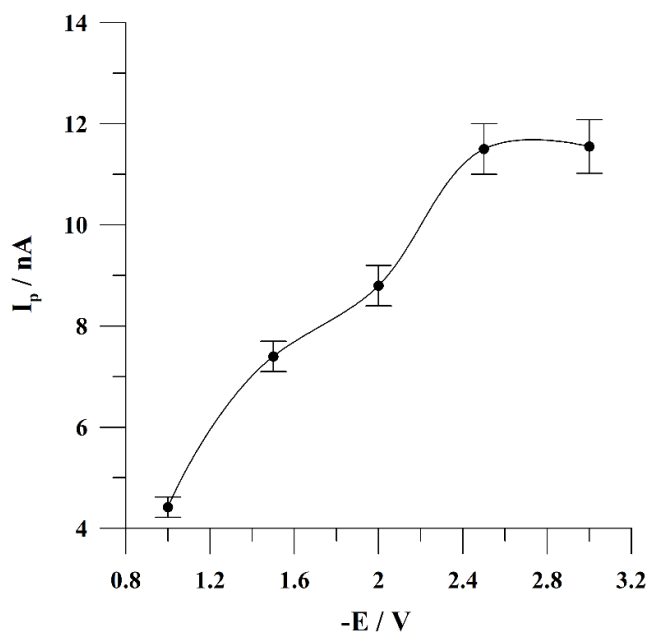

Figure S2. Effect of activation potential on U(VI) signal. U(VI) concentration:  $5 \times 10^{-8}$  mol L<sup>-1</sup>. Activation time: 4 s. Potential and time of accumulation: -0.7 V, 120 s. The error bars refer to the standard deviation (n = 3).

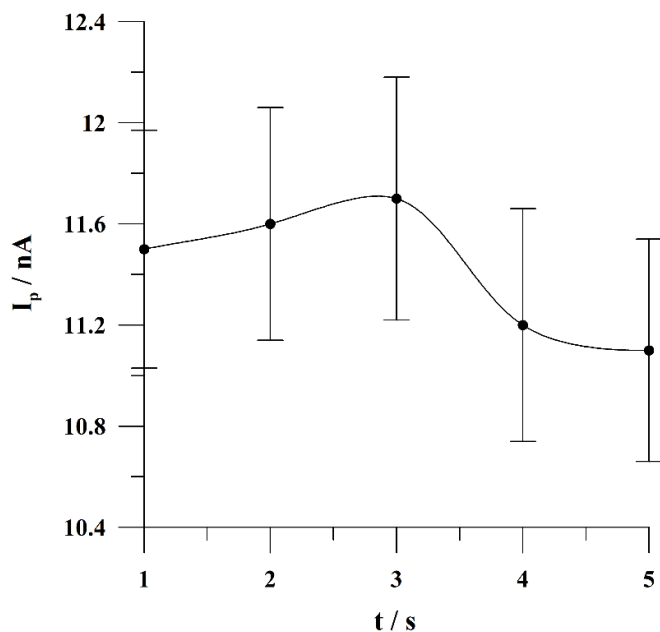

Figure S3. Effect of activation time on U(VI) signal. U(VI) concentration:  $5 \times 10^{-8}$  mol L<sup>-1</sup>. Activation potential: -2.5 V. Potential and time of accumulation: -0.7 V, 120 s. The error bars refer to the standard deviation (n = 3).
